# Supplementary material for: Engineering nitrogen-doped carbon quantum dots: investigating the role of dopant isomer configuration
Source: Royal Society of Chemistry journal article supplement (doi:10.1039/d6ra02179d), 2026-05-26
Supplement: d6ra02179d1.pdf [file d6ra02179d1.pdf]

Supplementary Information for

## **Engineering Nitrogen-Doped Carbon Quantum Dots: Investigating the Role of Dopant Isomer Configuration**

Maryam Rasouli<sup>a</sup>, Amir Rezvani-Moghaddam<sup>a,b</sup>, Yuxin Liu<sup>a</sup>, Roxana Moarefa<sup>a</sup>,  
Jinfeng Zhang<sup>a</sup>, Uttandaraman Sundararaj<sup>a\*</sup>

<sup>a</sup> Department of Chemical and Petroleum Engineering, University of Calgary, 2500 University Drive NW, Calgary, AB T2N 1N4 Canada

<sup>b</sup> Faculty of Polymer Engineering, Sahand University of Technology, P.O. Box, 51335–1996, Tabriz, Iran

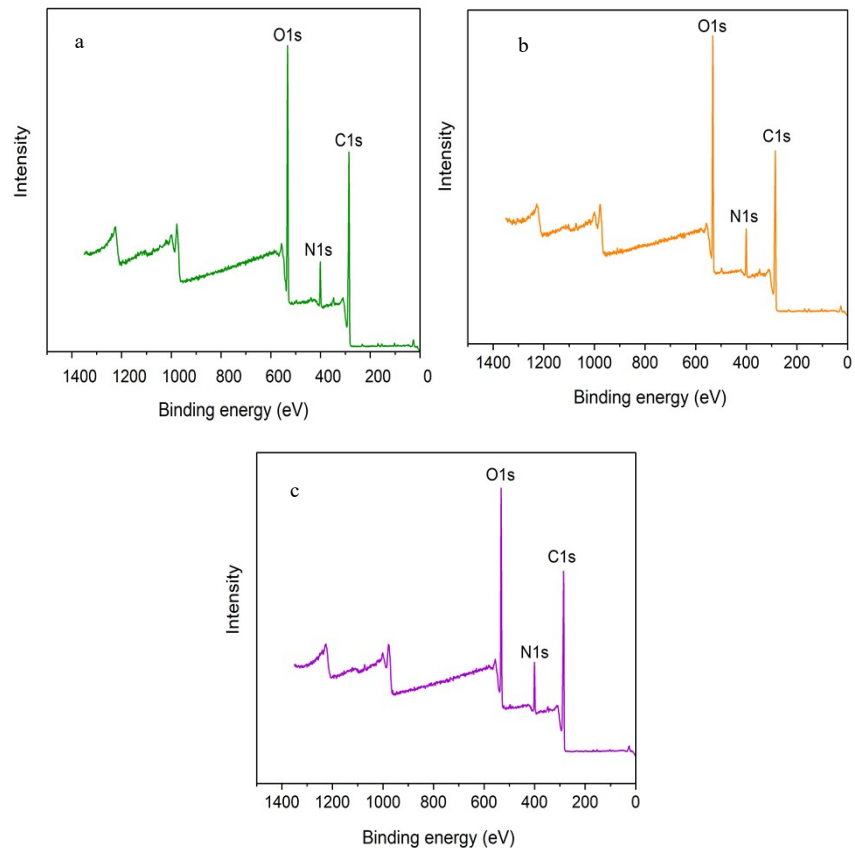

Figure S1. XPS survey for three distinct nanoparticles derived from different isomers of phenylenediamine:

a) OP:CA, b) MP:CA, c) PP:CA.

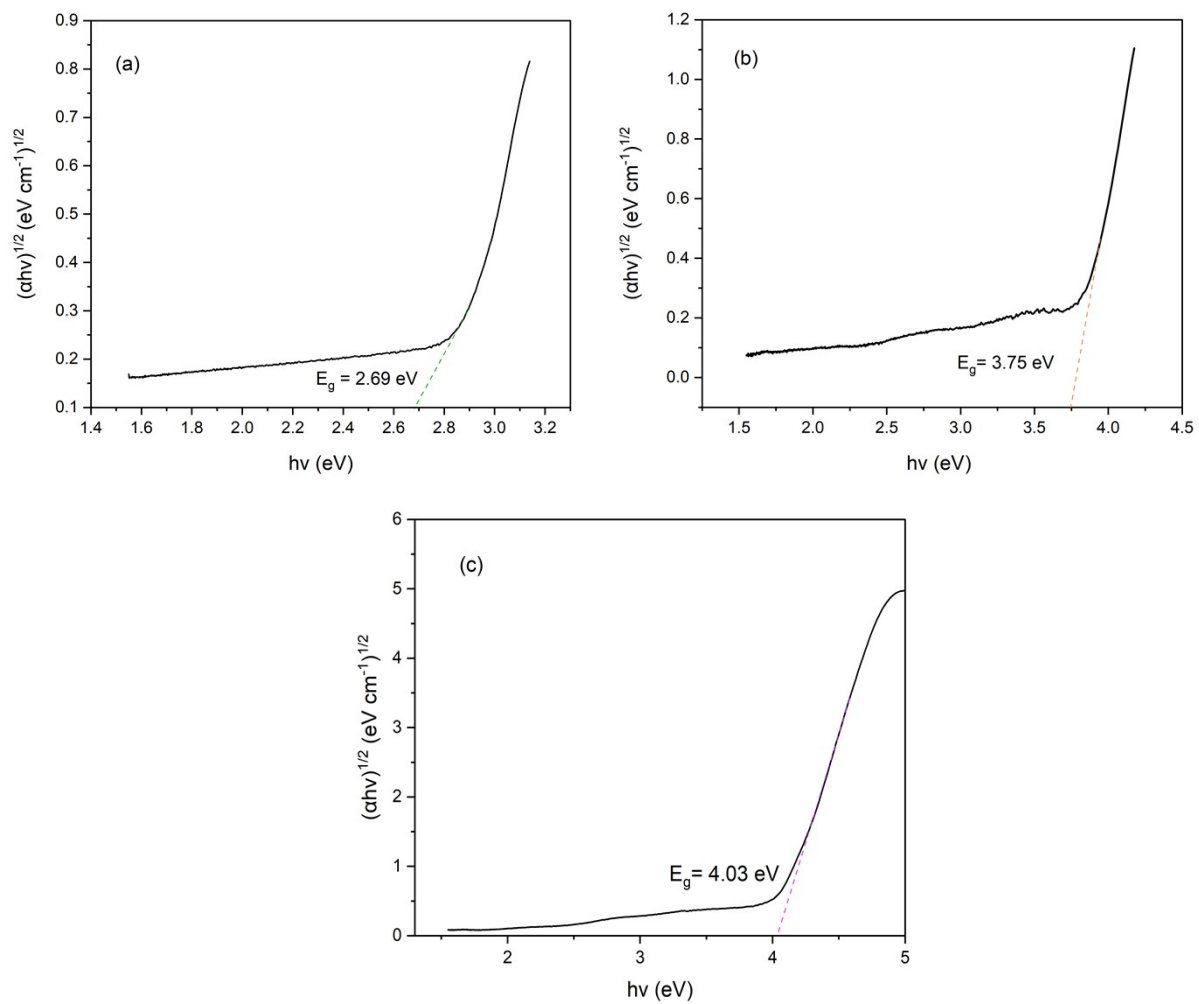

Figure S2. Tauc plots for three distinct nanoparticles derived from different isomers of phenylenediamine: a) OP:CA, b) MP:CA, c) PP:CA.

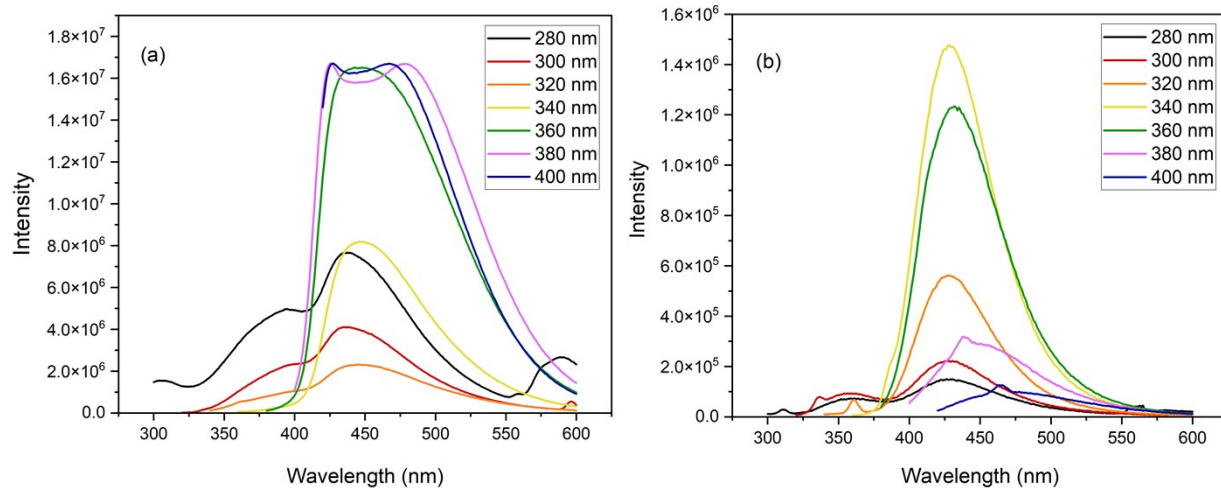

Figure S3. Emission spectra of N-CQDs: a) OP:CA, b) MP:CA

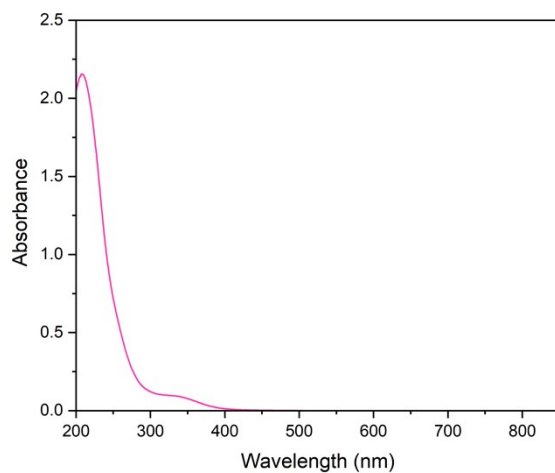

Figure S4. UV-Vis spectra of un-doped CQDs

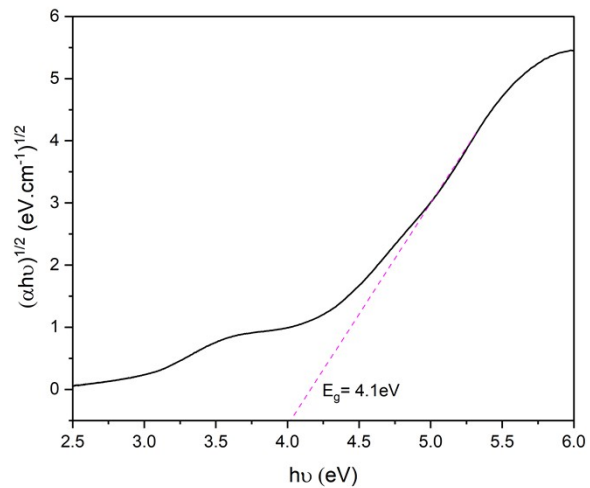

Figure S5. Tauc plot for un-doped CQDs

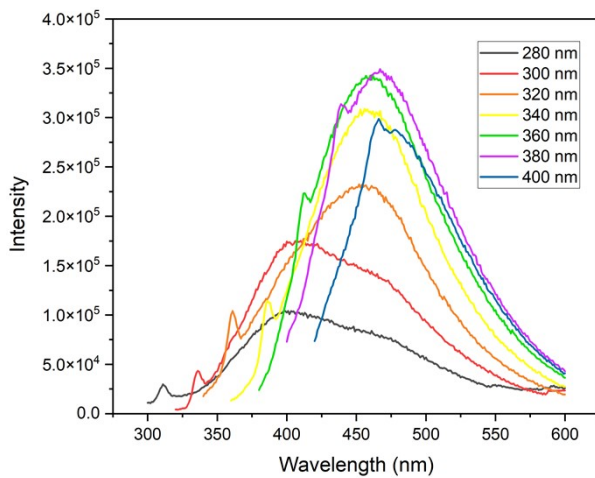

Figure S6. Emission spectra of un-doped-CQDs

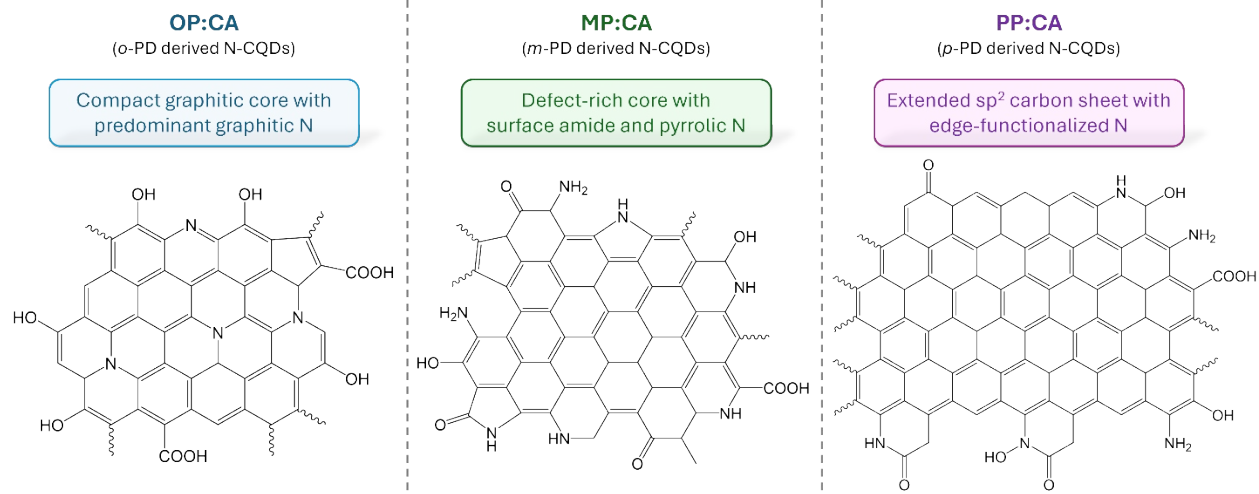

Figure S7. Proposed molecular-level structural models for the core of nitrogen-doped carbon nanomaterials synthesized from citric acid and phenylenediamine isomers.
